# Supplementary material for: Alkali-metal complexes of a triazacyclononane-functionalized tetramethylcyclopentadienyl ligand †
Source: Royal Society of Chemistry journal article supplement (doi:10.1039/b007075k), 2000-01-01
Supplement: b007075k.doc [file b007075k.doc]

# Supporting Information

# Alkali-Metal Complexes of a Triazacyclononane-Functionalized Tetramethylcyclopentadienyl Ligand

**Garth R. Giesbrecht, Andreas Gebauer, Alex Shafir and John Arnold***

*Department of Chemistry, University of California, Berkeley, and the Chemical Sciences Division, Lawrence Berkeley National Laboratory, Berkeley, CA, 94720-1460*

# Experimental Section

**General Consideration**: Standard Schlenk-line and glove box techniques were used. Pentane, toluene, diethyl ether and tetrahydrofuran were purified by passage through a column of activated alumina and degassed with argon prior to use. Pyridine was distilled over sodium/benzophenone. C6D6, C4D8O and C5D5N were vacuum transferred from sodium/benzophenone. CD3CN was vacuum transferred from P2O5. C5Me4HSiMe2Cl was purchased from Aldrich and used as received. BuLi was purchased from Alfa and used as received. (tacn)H,1 NaN(SiMe3)22 and KN(SiMe3)23 were prepared by literature methods. Melting points were determined in sealed capillary tubes under nitrogen and are uncorrected. 1H and 13C{1H} NMR spectra were recorded at ambient temperature on a Bruker AMX-300 spectrometer. 1H NMR chemical shifts are given relative to C6D5H (7.15 ppm), C4D7HO (3.58 ppm) or C5D4HN (8.71 ppm). 13C{1H} NMR spectra are relative to C6D6 (128.3 ppm), C4D8O (65.6 ppm) or CD3CN (1.4 ppm). IR samples were prepared as Nujol mulls and taken between KBr plates. Mass spectrometry was carried out on a VG ProSpec Micromass spectrometer. Elemental analyses were determined at the College of Chemistry, University of California, Berkeley. Single crystal X-ray structure determinations were performed at CHEXRAY, University of California, Berkeley.

**(tacn)Li (1).** BuLi (18.1 mL of a 2.6 M solution in hexanes, 47.1 mmol) was added dropwise via syringe to a solution of (tacn)H (10.1 g, 47.1 mmol) in diethyl ether kept at –78 ºC. The reaction mixture was left to stir and warm up to room temperature, forming an orange solution over a white precipitate. The solvent was then removed under vacuum to yield a white solid. Recrystallization from either pentane or diethyl ether resulted in large, colorless blocks (10.0 g, 97 % yield). mp: 223 - 225 ºC (dec) (Found: C, 65.87; H, 12.20; N, 19.20 %. C12H26N3Li requires C, 65.72; H, 11.95; N, 19.16 %); max/cm-1 2710(s), 2640(s), 1365(s), 1342(m), 1289(w), 1263(w), 1170(w), 1147(s), 1115(s), 1081(s), 1034(s), 997(w), 965(s), 895(w), 875(w), 842(w), 814(m), 723(w) (Nujol); H(C6D6) 3.45, 3.24, 2.75, 2.43, 2.36 and 2.20 (mult, 12H, ring C*H*2), 2.98 (sept, 2H, C*H*Me2, 3*J*H-H = 6.5 Hz), 1.24 and 0.89 (d, 12H, CH*Me2*, 3*J*H-H = 6.5 Hz); C(C6D6) 56.2, 54.2 and 46.1 (ring *C*H2), 54.7 (*C*HMe2), 22.2 and 15.3 (CH*Me*2).

**[C5Me4SiMe2(tacn)]H(2).** A THF solution (30 mL) of (tacn)Li (9.75 g, 44.5 mmol) was added via cannula to a solution of C5Me4HSiMe2Cl (9.55 g, 44.5 mmol) in 50 mL of THF maintained at –78 ºC. The yellow solution was left to warm up to room temperature and stir overnight. The solvent was then removed under vacuum and the resultant milky slurry extracted with pentane (2 x 100 mL). This was then passed through a frit lined with Celite to remove LiCl to yield a pale yellow solution. Removal of the solvent in vacuo yielded **2** as a viscous, yellow oil (16.7 g, 96 % yield). (Found: M+ 391. C23H45N3Si requires M+ 391.7); max/cm-1 1631(m), 1379(s), 1321(m), 1249(s), 1219(w), 1159(s), 1143(m), 1096(m), 1018(s), 982(sh), 950(m), 917(w), 874(m), 825(s), 776(m), 722(w), 689(w), 617(w) (neat); H(C6D6) 3.01 (s, 1H, C5Me4*H*), 2.93 and 2.63 (mult, 8H, ring C*H*2),2.72 (sept, 2H, C*H*Me2, 3*J*H-H = 6.0 Hz),2.47 (s, 4H, ring C*H*2), 2.04 and 1.89 (s, 12H, C5*Me*4), 0.93 (d, 12H, CH*Me2*, 3*J*H-H = 6.0 Hz), 0.12 (s, 6H, Si*Me*2); C(C6D6) 135.7, 133.4 and 57.0 (*C*5Me4), 55.0, 53.5 and 52.6 (ring *C*H2), 54.5 (*C*HMe2), 19.1 (CH*Me*2), 15.0 and 11.9 (C5*Me*4), -1.42 (Si*Me*2).

**[C5Me4SiMe2(tacn)]Li(3).** To an ethereal solution (10 mL) of **2** (1.65 g, 4.21 mmol) maintained at –78 ºC was added BuLi (1.62 mL of a 2.6M hexanes solution, 4.21 mmol) via syringe. Upon warming to room temperature, a white precipitate formed. This was then stirred for a further 3 h, after which time the solvent was removed under vacuum to yield a white solid. Cooling a saturated THF solution to 4 ºC afforded **3** as colorless blocks (1.3 g, 78 % yield). mp: 188 - 190 ºC (Found: C, 69.12; H, 11.31; N, 10.89 %. C23H44N3SiLi requires C, 69.47; H, 11.15; N, 10.57 %); max/cm-1 1299(s), 1261(m), 1246(m), 1149(m), 1123(m), 1054(m), 1020(m), 965(w), 901(m), 831(m), 803(s), 763(m), 725(m), 676(m), 626(w) (Nujol); H(C4D8O) 2.93 and 2.65 (mult, 8H, ring C*H*2),2.80 (sept, 2H, C*H*Me2, 3*J*H-H = 6.0 Hz),2.48 (s, 4H, ring C*H*2), 2.10 and 1.89 (s, 12H, C5*Me*4), 0.91 (d, 12H, CH*Me2*, 3*J*H-H = 6.0 Hz), 0.31 (s, 6H, Si*Me*2); C: the spectra of **3** in C6D6, C4D8O, C5D5N or CD3CN consisted of broad, unassignable peaks.

**[C5Me4SiMe2(tacn)]Na(4).** A THF solution (10 mL) of NaN(SiMe3)2 (485 mg, 2.64 mmol) was added via cannula to a THF solution (10 ml) of **2** (1.04 g, 2.64 mmol) at –78 ºC. This was left to warm up to room temperature and stir overnight to give a homogeneous yellow solution. The solvent was then removed under vacuum to afford a white solid. Layering a saturated THF solution with an equal volume of toluene resulted in large colorless plates (600 mg, 55 % yield). mp: 179-181 ºC (Found: C, 66.90; H, 10.82; N, 10.34 %. C23H44N3SiNa requires C, 66.78; H, 10.72; N, 10.16 %); max/cm-1 1489(m), 1302(s), 1262(w), 1240(w), 1152(m), 1129(m), 1113(m), 1085(m), 1054(m), 1022(m), 969(w), 905(s), 830(s), 806(s), 757(m), 721(w), 671(m), 623(w) (Nujol); H(C4D8O) 2.89 and 2.51 (mult, 8H, ring C*H*2),2.74 (sept, 2H, C*H*Me2, 3*J*H-H = 6.6 Hz),2.51 (s, 4H, ring C*H*2), 2.15 and 1.96 (s, 12H, C5*Me*4), 0.91 (d, 12H, CH*Me2*, 3*J*H-H = 6.6 Hz), 0.23 (s, 6H, Si*Me*2); C(C4D8O) 117.3, 111.7 and 101.0 (*C*5Me4), 56.3, 53.4 and 52.12 (ring *C*H2), 55.10 (*C*HMe2), 18.9 (CH*Me*2), 15.4 and 12.3 (C5*Me*4), 4.0 (Si*Me*2).

**[C5Me4SiMe2(tacn)]K(5).** A THF solution (10 mL) of KN(SiMe3)2 (450 mg, 2.26 mmol) was added via cannula to a THF solution (10 mL) of **2** (884 mg, 2.26 mmol) at –78 ºC. This was left to warm up to room temperature and stir overnight, resulting in a milky white slurry. The solvent was then removed under vacuum to afford a white solid. Cooling a saturated pyridine solution of **5** resulted in small colorless needles (710 mg, 73 % yield). mp: 115-118 ºC (Found: C, 62.88; H, 9.67; N, 9.25 %. C23H44N3SiK requires C, 64.27; H, 10.32; N, 9.78 %); max/cm-1 1320(s), 1248(2), 1159(s), 1113(m), 1092(m), 1059(w), 1018(s), 951(w), 913(w), 868(w), 823(m), 801(m), 758(w), 722(w), 675(w), 623(w) (Nujol); H(C5D5N)2.76 (sept, 2H, C*H*Me2, 3*J*H-H = 6.6 Hz), 2.71 and 2.63 (mult, 8H, ring C*H*2),2.61 (s, 4H, ring C*H*2), 2.50 and 2.32 (s, 12H, C5*Me*4), 0.92 (d, 12H, CH*Me2*, 3*J*H-H = 6.6 Hz), 0.61 (s, 6H, Si*Me*2); C(CD3CN) 112.6 and 100.1 (*C*5Me4, one peak obscured by solvent peak), 55.3, 53.1 and 52.3 (ring *C*H2), 55.2 (*C*HMe2), 18.6 (CH*Me*2), 14.5 and 11.3 (C5*Me*4), 3.2 (Si*Me*2).

# General Procedures for X-Ray Crystallography

A crystal of appropriate size was mounted on a glass capillary using Paratone-N hydrocarbon oil. The crystal was transferred to a Siemens SMART diffractometer/CCD area detector,4 centered in the beam, and cooled by a nitrogen flow low-temperature apparatus which had been previously calibrated by a thermocouple placed at the same position as the crystal. Preliminary orientation matrix and cell constants were determined by collection of 60 10-second frames, followed by spot integration and least squares refinement. A hemisphere of data was collected and the raw data were then integrated (XY spot spread = 1.60°; Z spot spread = 0.60°) using SAINT.5 Cell dimensions were calculated from all reflections with I > 10 . Data analysis and absorption correction were performed using Siemens XPREP.6 The data were corrected for Lorentz and polarization effects, but no correction for crystal decay was applied. The measured reflections were averaged. The structures were solved and refined with the teXsan software package7 using direct methods.8 All non-hydrogen atoms were refined anisotropically, unless stated otherwise. Hydrogen atoms were assigned idealized positions and were included in structure factor calculations, but were not refined, unless stated otherwise. The final residuals were refined against the data for which F2 > 3  (F2). The quantity minimized by the least squares program was w(|Fo| - |Fc|)2, where w is the weight of a given observation. The p factor, used to reduce the weight of intense reflections, was set to 0.03 throughout the refinement. The analytical forms of the scattering factor tables for the neutral atoms were used and all scattering factors were corrected for both the real and imaginary components of anomalous dispersion.

1 J. A. Halfen, W. B. Tolman and K. Weighardt, *Inorg. Synth.*, **1998,** *32*, 75.

1. C. R. Kruger and H. Niederprum, *Inorg. Synth*., **1966**, *8*, 15 - 21.
2. E. H. Barash, *Inorg. Chem*., **1993**, *32*, 497.

4 SMART Area-Detector Software Package, Madison, WI, 1993.

5 SAINT: SAX Area-Detector Integration Program, Madison, WI, 1995.

6 XPREP: Part of the SHELXTL Crystal Structure Determination Package, Madison, WI, 1995.

7 TeXsan: Crystal Structure Analysis Package, Molecular Structure Corporation, The Woodlands, TX, 1992.

8 SIR92: Structure Analysis Programs with Intelligent Control, Tokyo, 1992.
